# Supplementary material for: Suppression of osteoclast multinucleation via a posttranscriptional regulation–based spatiotemporally selective delivery system
Source: PubMed Central journal article supplement — Sci Adv. 2022 Jun 29;8(26):eabn3333. doi: 10.1126/sciadv.abn3333 (PMC9242458; doi:10.1126/sciadv.abn3333), 2022-06-29
Supplement: sciadv.abn3333_sm.pdf [file sciadv.abn3333_sm.pdf]

Supplementary Materials for  
**Suppression of osteoclast multinucleation via a posttranscriptional  
regulation–based spatiotemporally selective delivery system**

Qingqing Wang *et al.*

Corresponding author: Shunwu Fan, shunwu\_fan@zju.edu.cn; Xin Liu, xinliuzju@zju.edu.cn;  
Xianfeng Lin, xianfeng\_lin@zju.edu.cn

*Sci. Adv.* **8**, eabn3333 (2022)  
DOI: 10.1126/sciadv.abn3333

**The PDF file includes:**

Tables S1 to S3  
Figs. S1 to S11  
Legends for data S1 and S2

**Other Supplementary Material for this manuscript includes the following:**

Data S1 and S2

## Supplementary Tables and Figures

**Table S1. RT-qPCR primers**

| <b>Name</b>      | <b>Forward (5' to 3')</b>    | <b>Reverse (5' to 3')</b>   |
|------------------|------------------------------|-----------------------------|
| ciRNA975         | GATTAGATTCCGGGGTGCAC         | TTCTGAGATGCCCTGTGGAG        |
| ciRNA963         | GCATCATCATGGCAGGAAGT         | GCCTTGTGTCTGTACGAAGC        |
| circRNA10657     | CCTGTTCACTGAGGCTCA           | TGTAGTTGTTGCTGCAGGAG        |
| circRNA10902     | CACAAAGACAATGATGGGATTC<br>A  | CAGCACCGTGAGCATTGTG         |
| mmu-circ-0001391 | GGGGAGACTCTGGCTTTGAA         | TTCTTCTATGTATGGCCCAGTG      |
| mmu-circ-0011760 | GAAGAGGAAAAGCAACAATCAG<br>A  | TGTGTCCTGAGTCTTTGCCA        |
| mmu-circ-0009153 | CCTGAAATTCGAGATGGGCA         | ACCAGCAGTCTCAGCAGATG        |
| circRNA12046     | TTTGCTCGTAGTCCTGCTGA         | TTCCCCGTGGCTCCGT            |
| circRNA12368     | ACAACAACAACCCTTTCCAA         | TCAAACATGAAGACTTTC          |
| circRNA12608     | CCGCCTGAGGTGCTAC             | CACAAGCATGCCTCCATTGT        |
| circRNA12641     | TGTTGACATTGGAGCTCGTG         | GTGCGAACAACAACTTAGAACC<br>A |
| circRNA12743     | GGGGAAGTAAGGACCAGAGAC        | GGCGGTGTCATAATGTCTCTC       |
| circRNA12766     | ACAGAGAGGTTGAGCAGGAAA        | ATGCCTGTTCCATCTCAGCA        |
| circRNA2770      | TGTCGATGCTGAGAATTGTGC        | GTTTCCTGTTCTTGCATGGC        |
| circRNA12777     | GCAGAACTTGGCTCTCTCC          | CTCAAGTCTTGCAGGGTCCA        |
| circRNA12792     | GCACCAGCGTTGCCCTT            | GCTGTCGTAATTCTGCAGGG        |
| mmu-circ-0000295 | AGCCATGGATGAAGGACAGT         | CCACGCTGGCATAAACTAATTC      |
| mmu-circ-0013887 | GGCAAAGTGGATGTCTGGTC         | CTCCATCACCAGCTAGCTCA        |
| circRNA150       | CCCGCCAGCTACTCAAATTT         | CCCAAAACCAGATTCGCCTC        |
| circRNA2225      | ACAAAAGAAGGAGTGTGGAA         | CATATTGCAATAAGGTCTTCC       |
| circRNA4148      | TTCATTGACACGTTGCGAG          | TGTCGATGGTACTGCTCTGT        |
| mmu-circ-0004661 | ACCAAGACTTTCCTCCACA          | AGACCTTGGGAAGACTGTTTC       |
| mmu-circ-0006932 | CAGAAGACAAAGACAGCCCTG        | TTGCAGCATACTTGTCCAGC        |
| mmu-circ-0009699 | GGAGCAAATGGATGACTGGC         | TGAAGCATCCTGTCTTTTCTGT      |
| ciRNA975         | GATTAGATTCCGGGGTGCAC         | TTCTGAGATGCCCTGTGGAG        |
| circBBS9         | TGGAGTAATGCTAATGAGTTGA<br>GG | GCTGAGACTTCAGGCATGG         |
| has_circBBS9     | AGAGGGATTTATGAGTGATTGCT      | AGGTCTGACTCTGGGATTGT        |
| TRAF6            | GCAGTGAAAGATGACAGCGTGA       | TCCCGTAAAGCCATCAAGCA        |
| GAPDH            | AGGACACTGAGCAAGAGAGG         | GTAGCTGGGCCTCTCTCATT        |
| circ-GAPDH       | GTGCTCAACCAGTTAGCTCTC        | CCAAATCCGTTGACTCCGAC        |
| Bbs9             | CGAGCAAGCCCTTGATATCTG        | TCTGCCATTATCCTTTAGGCA       |
| Ctsk             | CCTGTTGGGCTTTCAGCTCT         | CCGTTCTGCTGCACGTATTG        |
| Nfatc1           | TTCGAGTTCGATCAGAGCGG         | AGGTGACACTAGGGGACACA        |
| Acp5             | TGGACCCACCGCCAAGATG          | CACAGCCACAAATCTCAGGGT       |
| c-fos            | CGAAGGGAACGGAATAAGATG        | GCTGCCAAAATAAACTCCAG        |

|                |                           |                        |
|----------------|---------------------------|------------------------|
| Cx3cr1         | TCGTCTTCACGTTTCGGTCTG     | CTCAAGGCCAGGTTTCAGGAG  |
| Itgax          | TTCATCTCCACGTCAAGCCC      | TCCACTTTGGGTGGTGAACA   |
| Cd74           | GGCTCCACCTAAAGAGCCAC      | GGGTGACTTGACCCAGTTCC   |
| S100a10        | GGTTTGCAGGCGACAAAGAC      | CAGAGGGTCCTTTTGATTTTCC |
|                |                           | A                      |
| Ube2s          | ACATGTGCTGCTGACCATCAA     | CCCGGGCAGCATACTCTTCA   |
| Jdp2           | CCGTCAGGCACATCAGGTTAT     | CTGAAGGGTCTGGGATCTGC   |
| mmu-miR-214-3p | TATAacagcaggcacagacaggc   |                        |
| mmu-miR-423-3p | TATagctcggtctgaggccc      |                        |
| mmu-miR-96-5p  | CGCtttgactagcacattttgct   |                        |
| mmu-miR-128-3p | CGtcacagtgaaccggtctctt    |                        |
| mmu-miR-30d-5p | CGtgtaaacatccccgactggaag  |                        |
| mmu-miR-30a-5p | CCGtgtaaacatcctcgactggaag |                        |

**Table S2. Nucleotide sequences**

|                               | Forward (5' to 3')     | Reverse (5' to 3')     |
|-------------------------------|------------------------|------------------------|
| pGPU6/GFP/Neo                 | TCATCTCTGGAGGTGGCTGTA  |                        |
| -CircBBS9-                    |                        |                        |
| shRNA                         |                        |                        |
| CircBBS9-                     | UCUCUGGAGGUGGCUGUACTT  | GUACAGCCACCUCCAGAGATT  |
| siRNA#1                       |                        |                        |
| CircBBS9-                     | CAUCUCUGGAGGUGGCUGUTT  | ACAGCCACCUCCAGAGAUGTT  |
| siRNA#2                       |                        |                        |
| CircBBS9-                     | CUCUGGAGGUGGCUGUACUTT  | AGUACAGCCACCUCCAGAGTT  |
| siRNA#3                       |                        |                        |
| siRNA <sup>hsa_circBBS9</sup> | CUACUCUCUGGUGGUUGUATT  | UACAACCACCAGAGAGUAGTT  |
|                               |                        |                        |
| miR-423-3p                    | AGCUCGGUCUGAGGCCCCUCAG | UGAGGGGCCUCAGACCGAGCUU |
| mimics                        | U                      | U                      |
| miR-423-3p                    | ACUGAGGGGCCUCAGACCGAGC |                        |
| inhibitor                     | U                      |                        |
| miR-423-3p                    | ACTGAGGGGCCTCAGACCGAGC |                        |
| sponge                        | T                      |                        |

**Table S3 Antibodies used for Western blots**

| Antibody           | Resource                 |
|--------------------|--------------------------|
| anti-mouse-CTSK    | Santa Cruz Biotechnology |
| anti-mouse-ATPV6D2 | Santa Cruz Biotechnology |
| anti-mouse-NFATc1  | Santa Cruz Biotechnology |
| anti-mouse-MMP9    | Santa Cruz Biotechnology |
| anti-mouse-CD47    | Solarbio                 |

|                               |                          |
|-------------------------------|--------------------------|
| anti-mouse-CD9                | Proteintech              |
| anti-mouse-DC-STAMP           | Novus Biologicals        |
| anti-mouse-Na-K-ATPase        | Santa Cruz Biotechnology |
| anti-mouse-TRAF6              | Santa Cruz Biotechnology |
| anti-mouse-C-Fos              | Santa Cruz Biotechnology |
| anti-mouse-integrin $\beta$ 3 | Santa Cruz Biotechnology |
| anti-mouse-GAPDH              | Santa Cruz Biotechnology |
| anti-mouse- $\beta$ -actin    | Santa Cruz Biotechnology |
| secondary antibody            | Sigma Aldrich            |

---

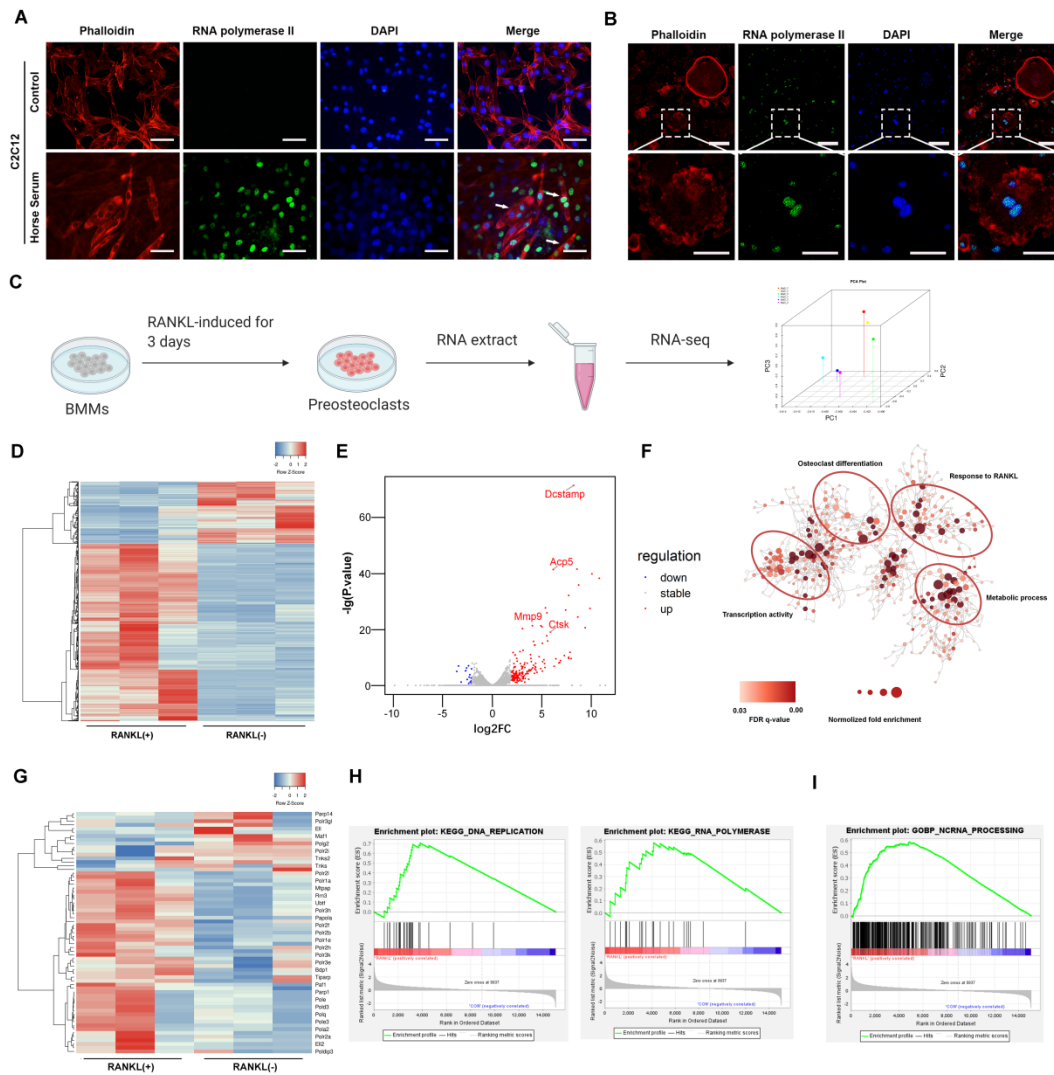

**Fig. S1. Transcription patterns in multinucleated cells.** (A) Representative confocal images of phalloidin and RNA polymerase II subjected to immunofluorescence staining in C2C12 cells with or without horse serum stimulation. Scale bar, 100  $\mu$ m. phalloidin, red, RNA polymerase II, green; nuclei, blue. (B) Representative confocal images of phalloidin and RNA poly II subjected to immunofluorescence staining in pOCs. Scale bar, 100  $\mu$ m. Enlarged scale bar, 50  $\mu$ m. phalloidin, red, RNA polymerase II, green; nuclei, blue. (C) Schematic illustration of RNA-seq of BMMs and preosteoclasts. (D) Heatmap analysis of differentially expressed genes between BMMs and pOCs. (E) Volcano plot showing the expression profiles between BMMs and pOCs. The red points in the plot indicate marker genes such as Dcstamp, Acp5, Mmp9, and Ctsk. (F) The upregulated genes were classified according to their biological processes. (G) Heatmap of RNA

polymerase-related gene expression. **(H)** Gene set enrichment analysis (GSEA) was applied to analyze gene sets, including DNA replication and RNA polymerase, between the BMM and pOC groups. **(I)** GSEA demonstrated that the ncRNA process was dramatically upregulated in pOCs.

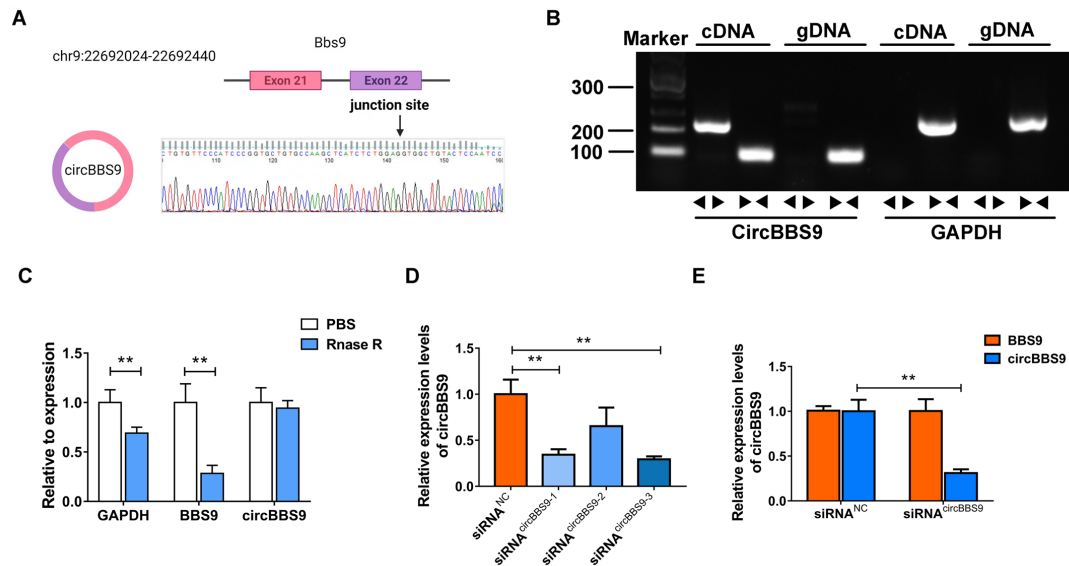

**Fig. S2. Identification of circBBS9.** **(A)** Sanger sequencing of circBBS9 **(B)** Convergent and divergent primers for circBBS9 or GAPDH were used to verify the closed loop structure by gel electrophoresis. **(C)** Identification of the closed loop structure of circBBS9 via an RNase R tolerance assay. **(D)** Three kinds of siRNAs were verified to knockdown circBBS9 in pOCs. **(E)** Expression of circBBS9 and its linear mRNA after treatment with circBBS9-siRNA in pOCs. \* $P < 0.05$ , and \*\* $P < 0.01$ . The values and error bars are the means  $\pm$  SDs.

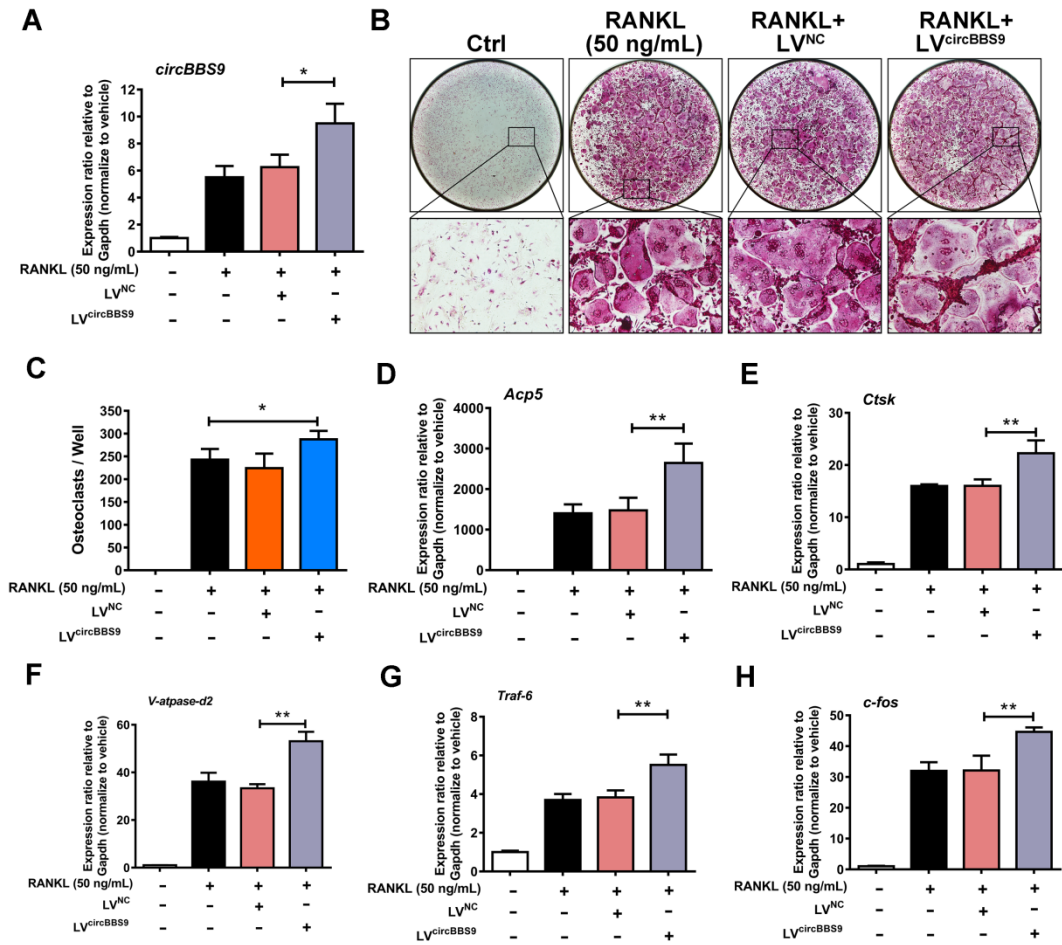

**Fig. S3. Effect of overexpression of circBBS9 in osteoclast multinucleation.**

(A) The expression of circBBS9 after transfection with LV<sup>NC</sup> and LV<sup>circBBS9</sup>. (B) Representative images and quantification of TRAP-positive cells per well (in a 96-well plate) in the presence of M-CSF and RANKL for 5 days with transfection with LV<sup>NC</sup> or LV<sup>circBBS9</sup> on day 3. (C) The number of TRAP-positive cells (>3 nuclei) was quantitatively analyzed. (D to H) Gene expression of *Acp5*, *Ctsk*, *V-atpase-d2*, *Traf-6*, and *c-fos* in preosteoclasts after transfection with LV<sup>NC</sup> or LV<sup>circBBS9</sup>. Scale bar, 200  $\mu$ m. \* $P < 0.05$ , and \*\* $P < 0.01$ . The values and error bars are the means  $\pm$  SDs.

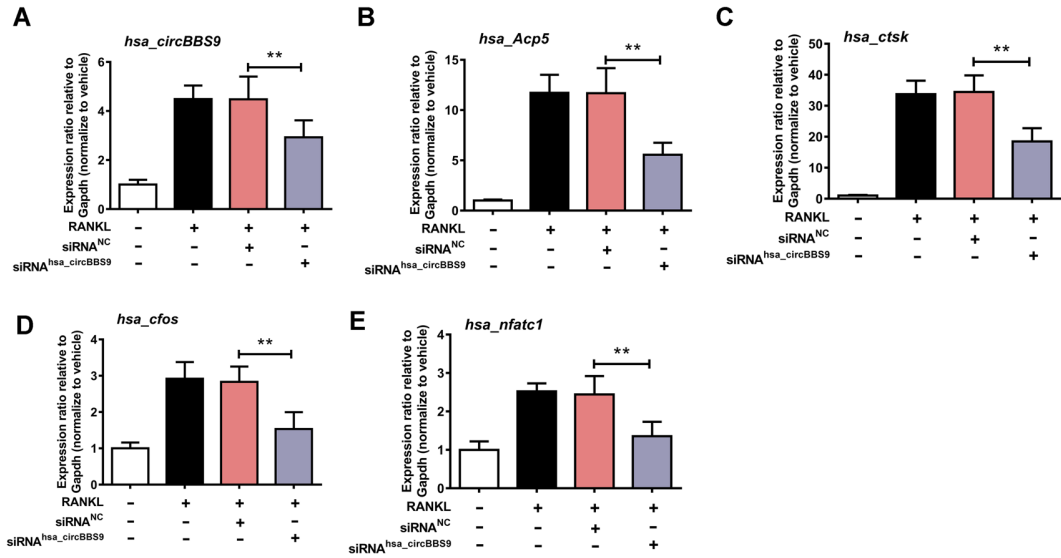

**Fig. S4. Effect of knockdown of *hsa\_circBBS9* in human osteoclast.**

(A) The expression of *hsa\_circBBS9* after transfection with siRNA<sup>NC</sup> and siRNA<sup>hsa\_circBBS9</sup>. (B to E) Gene expression of *Acp5*, *Ctsk*, *c-fos* and *Nfyc1* in Hum BMM after transfection with siRNA<sup>NC</sup> and siRNA<sup>hsa\_circBBS9</sup>. \* $P < 0.05$ , and \*\* $P < 0.01$ . The values and error bars are the means  $\pm$  SDs.

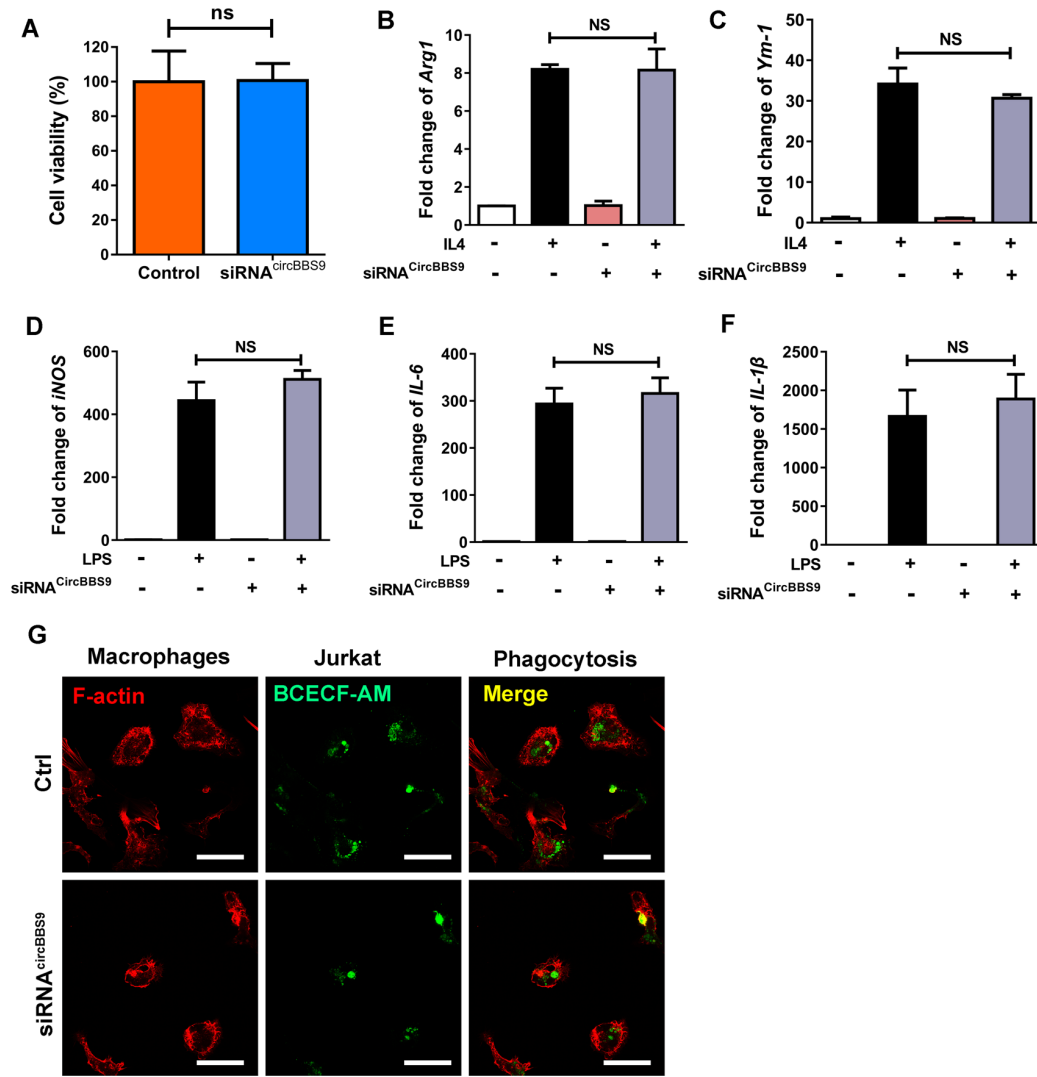

**Fig. S5. Effect of siRNA<sup>circBBS9</sup> in macrophage function.** (A) the cell viability of macrophages measured by CCK-8 with siRNA<sup>circBBS9</sup> treatment. (B to F) The mRNA expression of Arg1, Ym-1, iNOS, IL-6 and IL-1β with or without LPS and siRNA<sup>circBBS9</sup> treatment (G) Macrophages either untreated or treated with siRNA<sup>circBBS9</sup> were incubated with BCECF-AM-labeled apoptotic Jurkat for 2 h. Macrophages, red; Jurkat, green. Scale bar, 50μm.

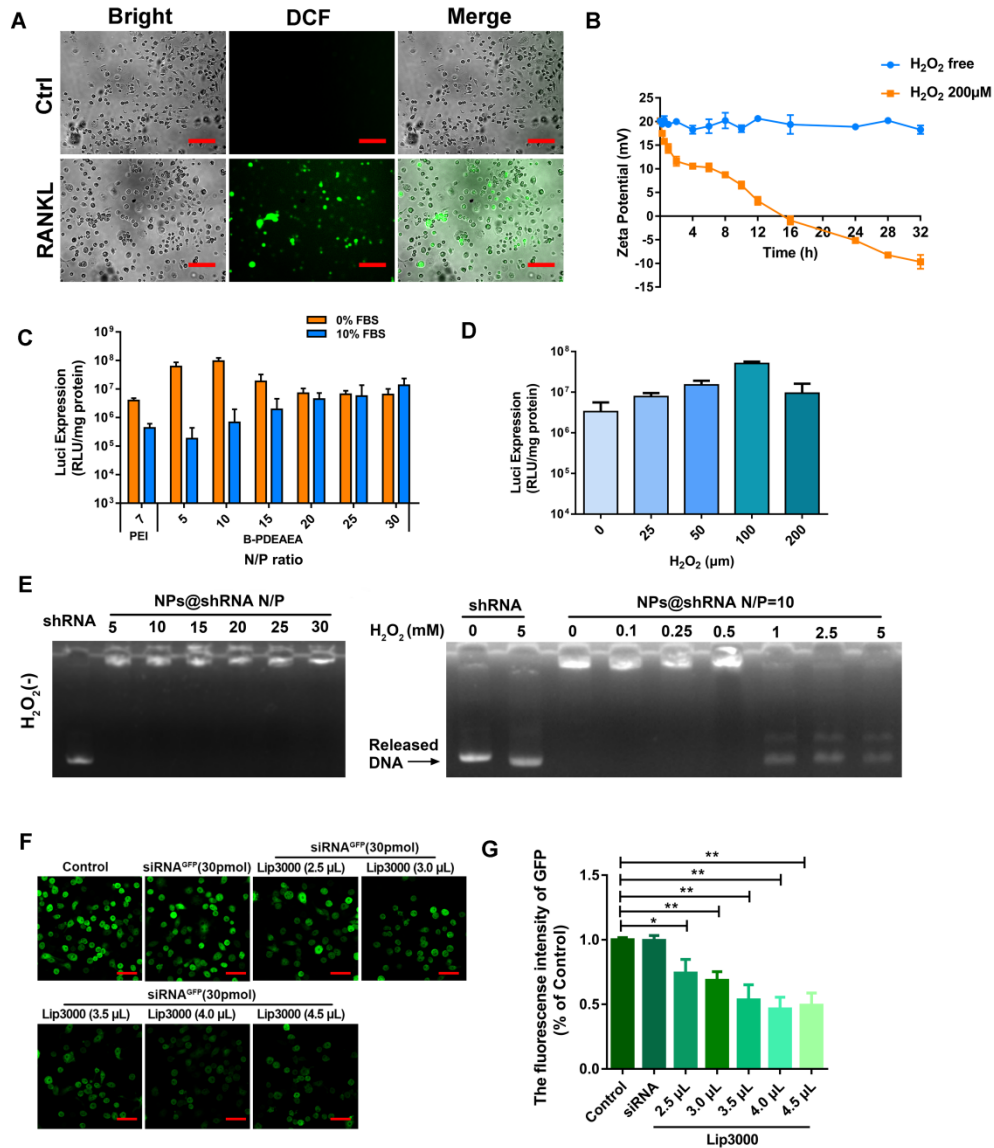

**Fig. S6. Preparation of NPs@siRNA/shRNA.** (A) Intensity of fluorescence showing the levels of ROS in BMMs and pOCs via DCF probe. (B) The zeta potential of B-PDEAEA with or without  $H_2O_2$ . (C) Luciferase expression in RAW264.7 cells of NPs at different N/P ratios with or without 10% serum-containing medium. (D) Luciferase expression of NPs in RAW264.7 cells at a 10 N/P ratio after 0, 25, 50, 100, and 200  $\mu$ M  $H_2O_2$  treatment. (E) Gel retardation assay of NPs@shRNA at designed N/P ratios after 1 h of incubation with or without  $H_2O_2$  at 37 °C. (F and G) Representative images and quantification of GFP intensity by siRNA transfection with different concentration of Lip3000. \* $P < 0.05$ , and \*\* $P < 0.01$ . The values and error bars are the means  $\pm$  SDs.

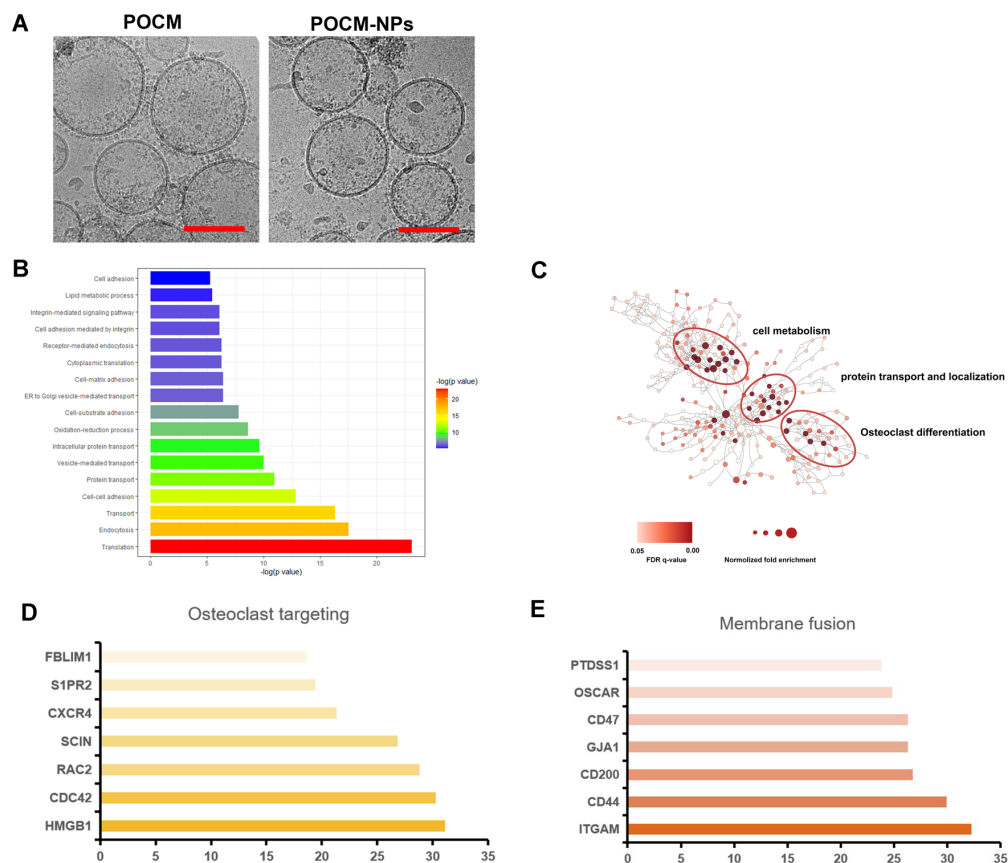

**Fig. S7. Image and proteomic analysis of POCM.** (A) General images of POCM and POCM-NPs by cryo-EM. Scale bar 100nm. (B) Bar plot of Gene Ontology biological processes (BP). (C) Upregulated genes were classified according to biological processes. (D and E) Expression of osteoclast targeting- and fusion-related proteins in the pOC membrane.

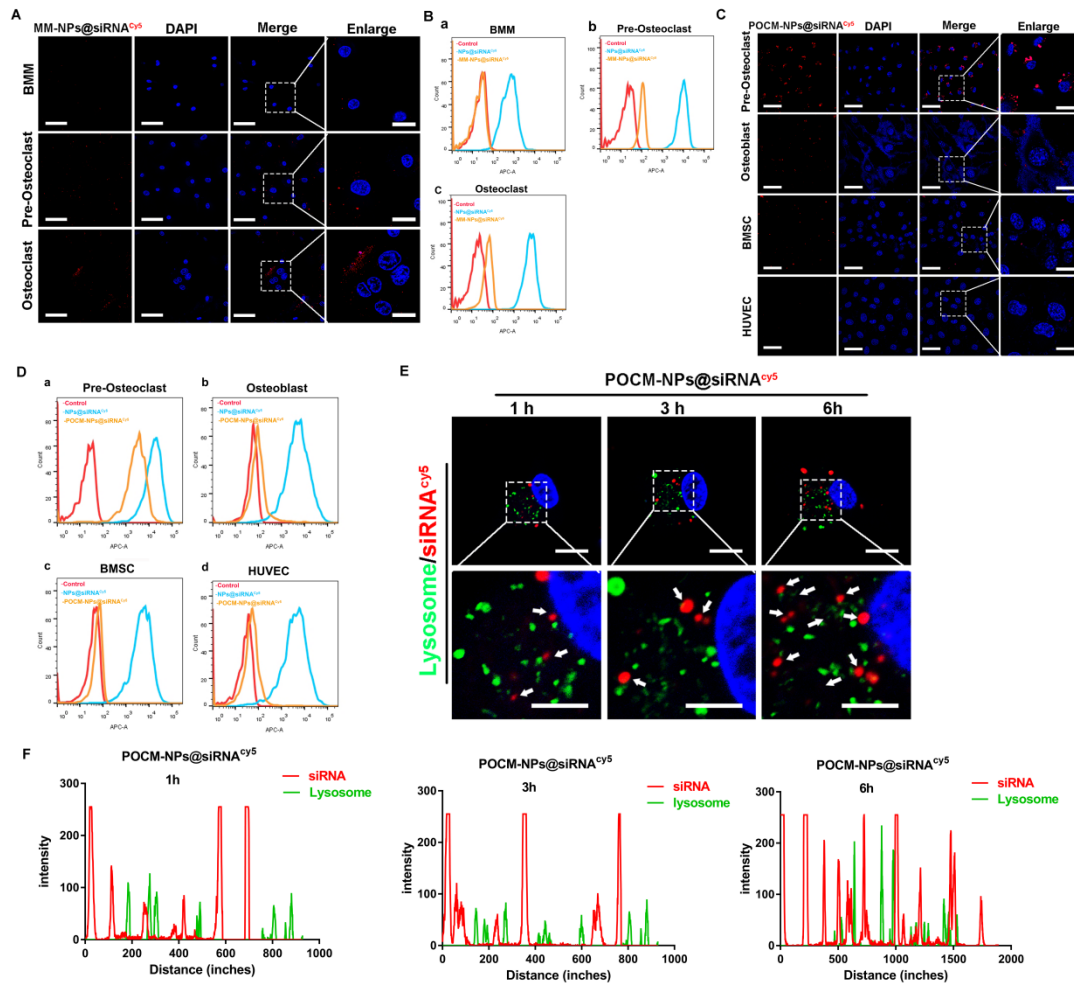

**Fig. S8. Self-recognized binding and fusion-mediated intracellular release of POCM-NPs@siRNA.**

Representative fluorescence visualization showing low binding efficiency of Cy5-labeled MM-NPs@siRNA<sup>Cy5</sup> in BMMs, pOCs, and mOCs. Scale bar, 50  $\mu$ m. Enlarged scale bar, 20  $\mu$ m. RNA, red. **(B)** Cy5-positive BMM, pre-osteoclast and osteoclast measured by flow cytometry after treatment of MM-NPs@siRNA<sup>Cy5</sup>. **(C)** Representative fluorescence images of Cy5-labeled POCM-NPs@siRNA<sup>Cy5</sup> uptake by preosteoclast, osteoblast, BMSC, and HUVECs. Scale bar, 50  $\mu$ m. Enlarged scale bar, 20  $\mu$ m. RNA, red; nuclei, blue. **(D)** Cy5-positive preosteoclast, osteoblast, BMSC and HUVEC were measured by flow cytometry after treatment of POCM-NPs@siRNA<sup>Cy5</sup>. **(E and F)** Fluorescent visualization of siRNA<sup>Cy5</sup> and lysosome localization in pOCs after incubation with POCM-NPs@siRNA<sup>Cy5</sup> for 1 h, 3 h, and 6 h. And intensity profiles

across the cell along the selected line (indicated by a yellow line in the inset image). Scale bar, 10  $\mu$ m. Enlarged scale bar, 5  $\mu$ m. RNA, red; nuclei, blue; lysosome, green.

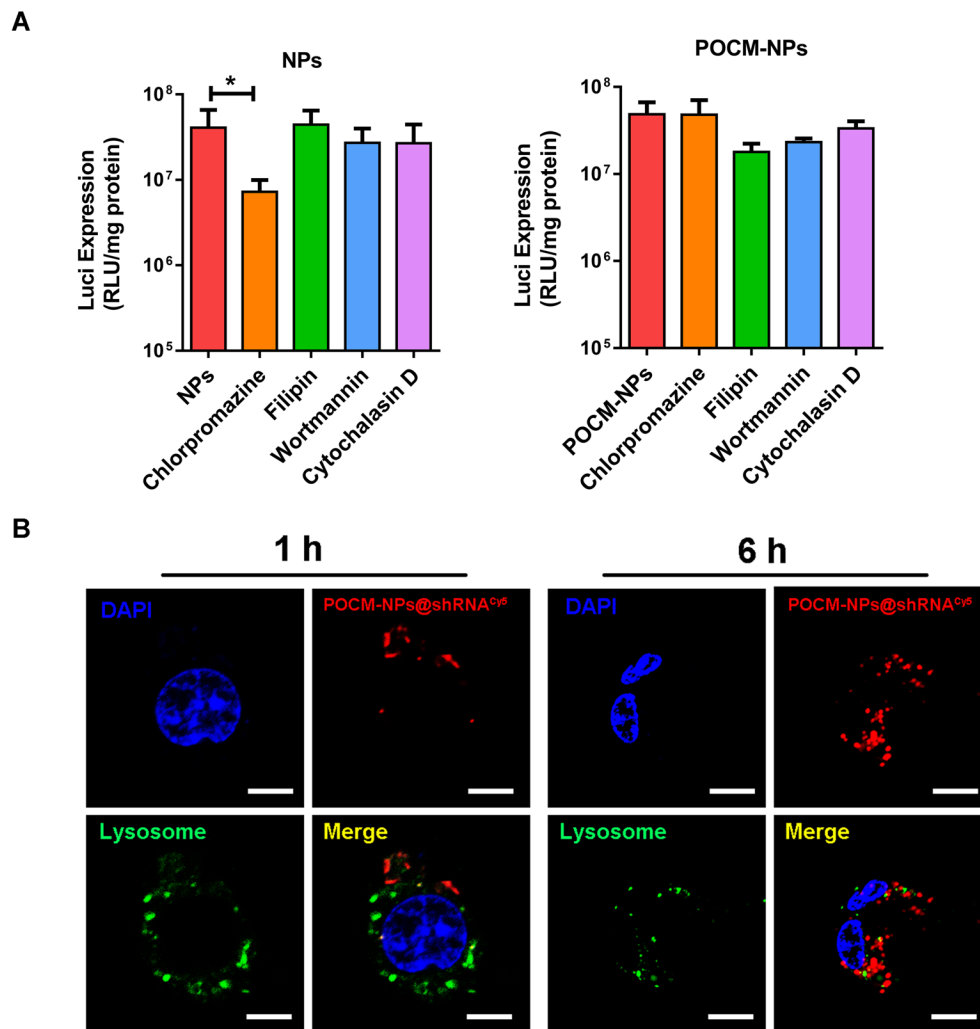

**Fig. S9. Intracellular release of POCM-NPs@siRNA/shRNA.**

(A) The luciferase gene transfection efficiency of NPs or POCM-NPs in pOCs after 48 h. pOCs were separately pretreated with endocytosis-related inhibitors for 0.5 h at 37 °C. (B) Fluorescence visualization of shRNA<sup>cy5</sup> and lysosome localization in pOCs after incubation with POCM-NPs@shRNA<sup>cy5</sup> for 1 h and 6 h. Scale bar, 10  $\mu$ m. RNA, red; nuclei, blue; lysosome, green.

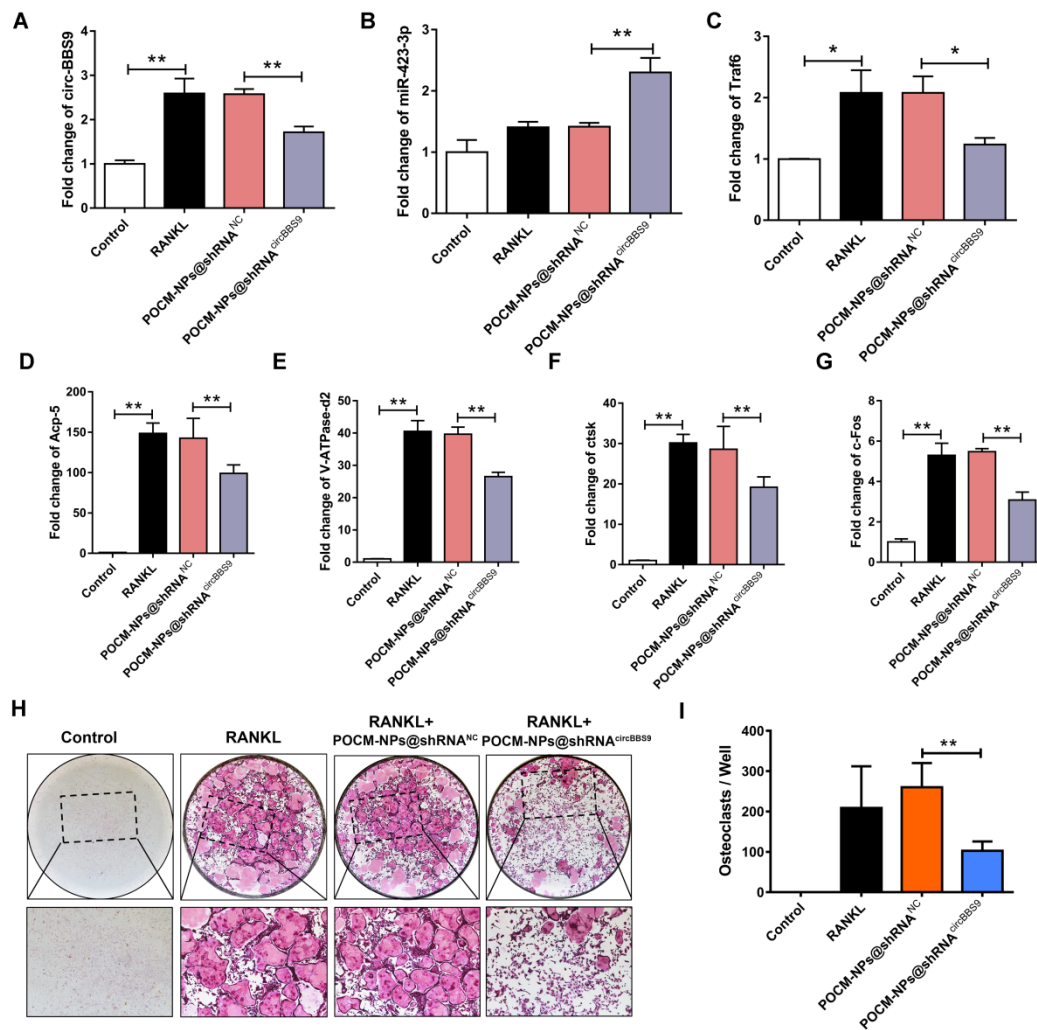

**Fig. S10. Gene silencing of POCM-NPs@shRNA<sup>circBBS9</sup>.** (A to C) Expression of circBBS9, miR-423-3p, and Traf6 detected by RT-qPCR. (D to G) Expression of Acp5, V-atpase-d2, Ctsk and c-fos the presence of M-CSF and RANKL for 5 days after transfection with POCM-NPs@shRNA<sup>circBBS9</sup> or shRNA<sup>NC</sup>. (H) Representative images and quantification of TRAP-positive cells per well (in a 96-well plate) in the presence of M-CSF and RANKL for 5 days with transfection with shRNA<sup>circBBS9</sup> or shRNA<sup>NC</sup> on day 3. (I) The number of TRAP-positive cells (>3 nuclei) was quantitatively analyzed. Scale bar, 200  $\mu$ m. \* $P$  < 0.05, and \*\* $P$  < 0.01. The values and error bars are the means  $\pm$  SDs.

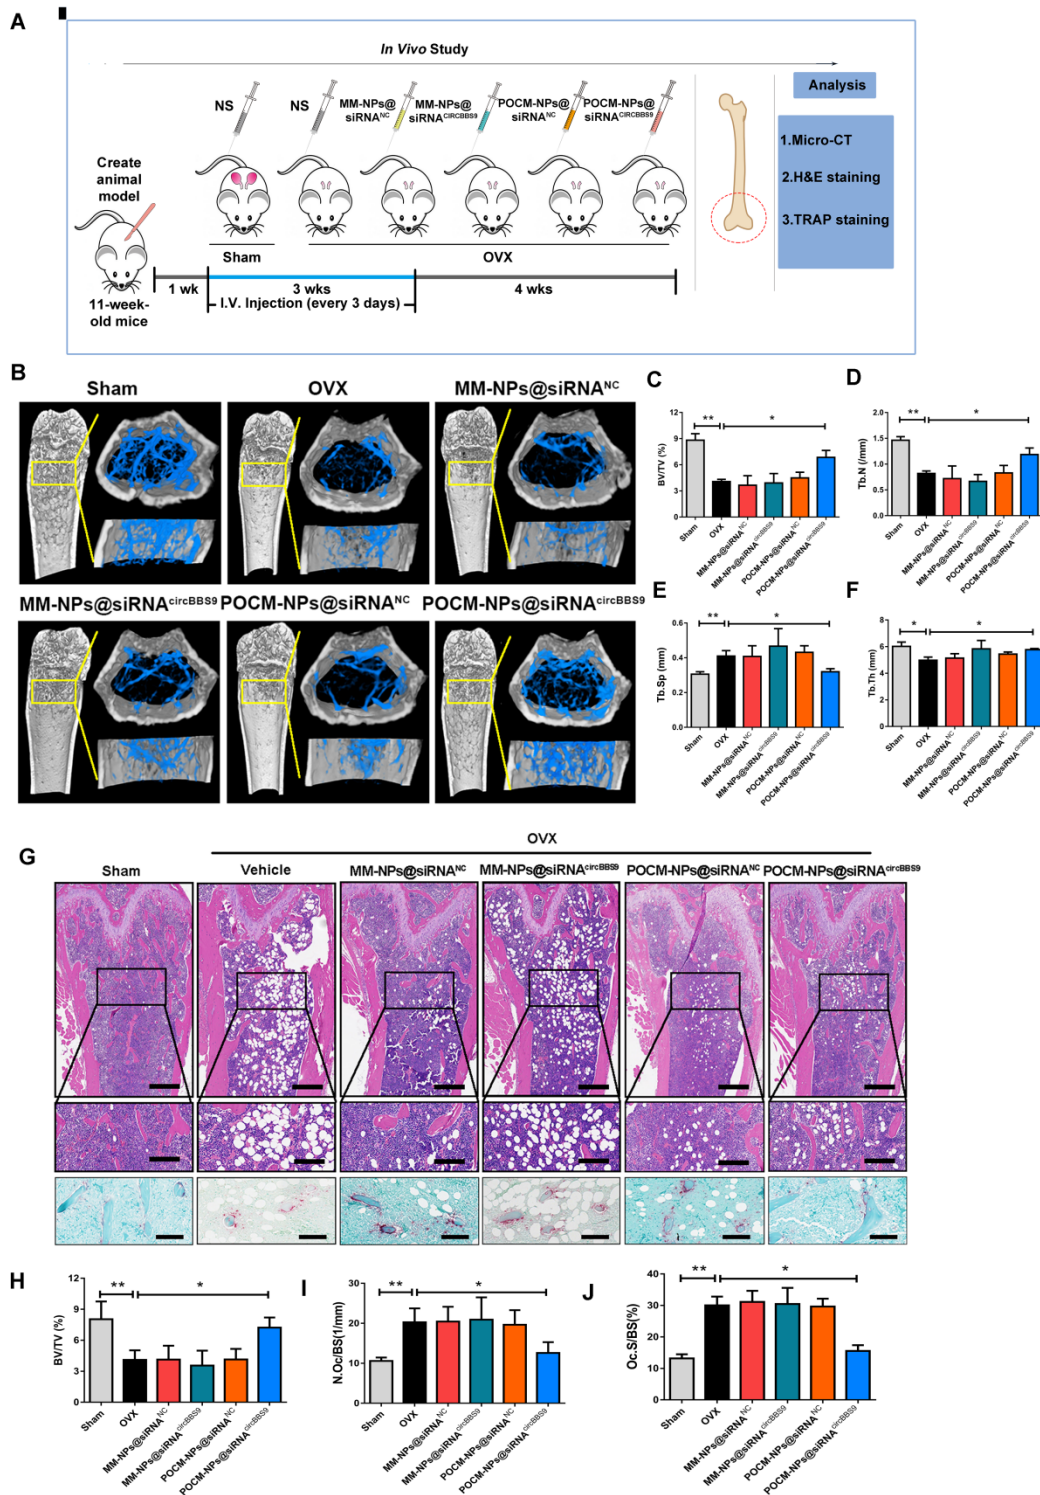

**Fig. S11. Preventive effect on osteoporosis of POCM-NPs@siRNA<sup>circBBS9</sup>.** (A) Schematic illustration of the process and group division of animal experiments. (B) Micro-CT evaluation of the femur and tibia bone mass in each group. (C to F) Quantitative measurements of bone microstructure-related parameters, such as BV/TV, Tb.Sp, Tb.N, and Tb.Th, in the sham, PBS, MM-NPs@siRNA<sup>NC</sup>, MM-

NPs@siRNA<sup>circBBS9</sup>, POCM-NPs@siRNA<sup>NC</sup> and POCM-NPs@siRNA<sup>circBBS9</sup> groups. (G to J) H&E and TRAP staining images and quantitative statistics of BV/TV, osteoclast number per bone surface (OC.N/BS), and osteoclast surface area per bone surface (OC.S/BS) in each group. Scale bar, 400  $\mu$ m. Enlarged scale bar, 200  $\mu$ m. \* $P < 0.05$ , and \*\* $P < 0.01$ . The values and error bars are the means  $\pm$  SDs.

**Other Supplementary Material for this manuscript includes the following:**

**Data file S1.**

**mRNA profile of BMMs and pOCs by RNA-seq.**

Provided as a separate Excel file.

**Data file S2.**

**Proteomics profile of BMMs and pOCs by mass spectrometry.**

Provided as a separate Excel file.
